# Supplementary material for: Zoledronic acid and thymosin α1 elicit antitumor immunity against prostate cancer by enhancing tumor inflammation and cytotoxic T cells
Source: PubMed Central journal article supplement — J Immunother Cancer. 2023 Jun 9;11(6):e006381. doi: 10.1136/jitc-2022-006381 (PMC10277537; doi:10.1136/jitc-2022-006381), 2023-06-09
Supplement: jitc-2022-006381supp002.pdf [file jitc-2022-006381supp002.pdf]

**Supplemental Tables****Supplementary Table 1.** The clinical information of PCa patients in Control and ZA + Tα1 groups**Control group**

| Patients   | Age | Therapeutic regimens                                                                              | Pre-treatment timepoints | Biomarker levels (ng/ml) |         |          | Post-treatment timepoints | Biomarker levels (ng/ml) |         |          | Gleason score | TNM stage |
|------------|-----|---------------------------------------------------------------------------------------------------|--------------------------|--------------------------|---------|----------|---------------------------|--------------------------|---------|----------|---------------|-----------|
|            |     |                                                                                                   |                          | PAP                      | PSA     | Free PSA |                           | PAP                      | PSA     | Free PSA |               |           |
| Patient 1  | 60  | Bicalutamide                                                                                      | 2010-6-30                | 100                      | 254.18  | 27.592   | 2011-6-7                  | 42.3                     | 185.67  | 22.002   | Unknown       | TxN0M1b   |
| Patient 2  | 61  | Bicalutamide and chemotherapy (gemcitabine plus platinum)                                         | 2011-3-16                | 26.5                     | 41.81   | 13.998   | 2012-8-16                 | 6.25                     | 34.733  | 11.441   | Unknown       | T4N1M1c   |
| Patient 3  | 70  | Bicalutamide, gemcitabine, and tripraline acetate                                                 | 2013-4-27                | 100                      | 207.23  | 27.486   | 2013-10-11                | 96.4                     | 183.603 | 36.498   | 8             | T4N1M1b   |
| Patient 4  | 71  | Bicalutamide, chemotherapy (docetaxel), pyramidal radiotherapy, and bilateral orchiectomy         | 2012-9-14                | 45.3                     | 305.248 | 118.28   | 2013-9-25                 | 0.71                     | 0.033   | 0.019    | 9             | TxN0M1c   |
| Patient 5  | 63  | Bicalutamide, goserrelin, and bilateral orchiectomy                                               | 2014-10-24               | 93.3                     | 196.97  | 93.3     | 2015-8-5                  | 7.31                     | 462.59  | 38.366   | Unknown       | TxN0M1b   |
| Patient 6  | 70  | Bicalutamide and chemotherapy (docetaxel)                                                         | 2017-4-6                 | 1                        | 0.49    | 0.14     | 2018-4-18                 | 1.49                     | 0.38    | 0.07     | 9             | T4N1M1b   |
| Patient 7  | 79  | Bicalutamide                                                                                      | 2018-9-14                | 1.18                     | 2.26    | 0.36     | 2019-12-12                | 0.73                     | 2       | 0.43     | 5             | TxN0M1b   |
| Patient 8  | 65  | Bicalutamide, goserrelin, and abiraterone                                                         | 2018-4-20                | 51                       | 20.06   | 6.22     | 2019-5-14                 | 49                       | 18.24   | 9.14     | 9             | T4N1M0    |
| Patient 9  | 83  | Bicalutamide, goserrelin, and radiotherapy                                                        | 2019-6-11                | 10.41                    | 279.09  | 55.23    | 2020-4-17                 | 1.704                    | 393.9   | 90.7     | Unknown       | TxN0M1b   |
| Patient 10 | 75  | Abiraterone and radiotherapy                                                                      | 2018-5-4                 | 3.08                     | 1.46    | 0.5      | 2019-5-29                 | 0.864                    | 2       | 0.81     | 8             | T4N0M1b   |
| Patient 11 | 68  | Enzalutamide, abiraterone, and chemotherapy (paclitaxel liposome for injection), and radiotherapy | 2019-12-17               | 3.187                    | 295.1   | 41.6     | 2020-10-11                | 28.87                    | 558.36  | 127.05   | 7             | T2N1M1c   |
| Patient 12 | 71  | Bicalutamide, goserrelin, and bilateral orchiectomy                                               | 2021-3-26                | 0.204                    | 0.28    | 0.03     | 2021-9-7                  | 0.805                    | 34.67   | 0.78     | 7             | T2N1M0    |
| Patient 13 | 65  | Bicalutamide, chemotherapy (docetaxel and lobaplatin), and goserrelin                             | 2020-5-5                 | 2.128                    | 0.91    | 0.29     | 2021-5-30                 | 1.442                    | 0.79    | 0.12     | 7             | T4N1M1c   |
| Patient 14 | 57  | Abiraterone and zoledronic acid                                                                   | 2021-10-7                | 6.548                    | 11.54   | 1.54     | 2022-8-20                 | 2.543                    | 2.77    | 0.43     | Unknown       | T4N1M1b   |
| Patient 15 | 75  | Bicalutamide, goserrelin, incadronnate disodium, and radiotherapy                                 | 2020-7-12                | 100                      | 725.7   | 88.56    | 2020-8-4                  | 89.02                    | 328.4   | 47.1     | 7             | TxN0M1c   |
| Patient 16 | 77  | Bicalutamide, chemotherapy (paclitaxel liposome for injection), and radiotherapy                  | 2019-7-29                | 8.781                    | 111.22  | 10.78    | 2020-1-2                  | 33.38                    | 316.35  | 36.85    | Unknown       | TxN0M1c   |
| Patient 17 | 70  | Enzalutamide, abiraterone, chemotherapy, and radiotherapy                                         | 2018-8-10                | 2.21                     | 79.86   | 7.31     | 2018-10-27                | 5.14                     | 116.46  | 7.2      | Unknown       | TxN1M1c   |
| Patient 18 | 62  | Bicalutamide and adjuvant pelvic radiation therapy                                                | 2019-2-17                | 1.31                     | 0.24    | 0.07     | 2019-3-13                 | 1.91                     | 0.13    | 0.05     | 9             | T4N0M0    |
| Patient 19 | 73  | Bicalutamide                                                                                      | 2019-8-22                | 15.08                    | 103.38  | 29.55    | 2020-7-25                 | 8.182                    | 184.8   | 54.23    | 7             | T3N1M1b   |
| Patient 20 | 65  | Bicalutamide                                                                                      | 2020-7-23                | 26.12                    | 182.5   | 18.14    | 2021-5-18                 | 23.95                    | 36.12   | 11.81    | 8             | T4N1M1b   |
| Patient 21 | 71  | Bicalutamide                                                                                      | 2012-2-27                | 34.6                     | 104.775 | 15.487   | 2012-11-20                | 50                       | 559.998 | 49.374   | Unknown       | T4N0M1b   |
| Patient 22 | 70  | Bicalutamide                                                                                      | 2012-3-20                | 1.45                     | 52.791  | 14.621   | 2013-3-27                 | 1.42                     | 648.51  | 95.46    | Unknown       | T4N1M1c   |
| Patient 23 | 58  | Bicalutamide and chemotherapy (docetaxel)                                                         | 2017-3-2                 | 4.86                     | 10.3    | 3.31     | 2018-5-23                 | 53.3                     | 252.15  | 44.25    | 9             | T4N1M0    |

**ZA + Tα1 group**

| Patients  | Age | Therapeutic regimens                                                                                                   | Pre-treatment timepoints | Biomarker levels (ng/ml) |        |          | Post-treatment timepoints | Biomarker levels (ng/ml) |       |          | Gleason score | TNM stage |
|-----------|-----|------------------------------------------------------------------------------------------------------------------------|--------------------------|--------------------------|--------|----------|---------------------------|--------------------------|-------|----------|---------------|-----------|
|           |     |                                                                                                                        |                          | PAP                      | PSA    | Free PSA |                           | PAP                      | PSA   | Free PSA |               |           |
| Patient 1 | 72  | Bicalutamide, zoledronic acid, thymalfasin, liver protection, nutritional supplement, and other symptomatic treatments | 2018-8-13                | 51.8                     | 272.56 | 14.26    | 2018-12-20                | 1.66                     | 14.32 | 1.31     | Unknown       | T4N1M1c   |
| Patient 2 | 73  | Bicalutamide, zoledronic acid, thymalfasin, and vitamin C                                                              | 2019-9-17                | 5.369                    | 68.21  | 4.69     | 2020-9-15                 | 1.706                    | 5.06  | 0.49     | Unknown       | T3N1M1b   |

|            |    |                                                                                                                                                                                        |            |       |        |       |            |       |        |       |         |         |
|------------|----|----------------------------------------------------------------------------------------------------------------------------------------------------------------------------------------|------------|-------|--------|-------|------------|-------|--------|-------|---------|---------|
| Patient 3  | 69 | Abiraterone, bicalutamide, zoledronic acid, thymalfasin, liver protection, stomach protection, and invigorating qi and invigorating herbal medicines                                   | 2019-2-13  | 2.71  | 44.88  | 7.63  | 2020-2-19  | 0.575 | 8.37   | 1.06  | 10      | T4N1M0  |
| Patient 4  | 69 | Bicalutamide, zoledronic acid, and thymalfasin                                                                                                                                         | 2018-8-23  | 8.77  | 49.07  | 2.4   | 2019-7-30  | 6.578 | 15.77  | 0.8   | 7       | T4N1M0  |
| Patient 5  | 66 | Bicalutamide, zoledronic acid, thymalfasin, liver protection, and invigorating qi and invigorating herbal medicines                                                                    | 2019-11-6  | 23.8  | 196.74 | 14.83 | 2020-12-10 | 16.15 | 39.61  | 4.55  | 9       | T4N0M0  |
| Patient 6  | 81 | Bicalutamide, Digiochemotherapy, zoledronic acid, and thymalfasin                                                                                                                      | 2017-12-4  | 68.6  | 371.91 | 60.27 | 2020-7-21  | 46.17 | 162.8  | 23    | Unknown | T3N1M1b |
| Patient 7  | 80 | Bicalutamide, goserelin, zoledronic acid, thymalfasin, and liver protection treatment                                                                                                  | 2017-10-26 | 13.9  | 8.44   | 1.97  | 2018-10-29 | 0.839 | 0.02   | 0.01  | 8       | T3N1M1b |
| Patient 8  | 62 | Bicalutamide, docetaxel, zoledronic acid, and thymalfasin                                                                                                                              | 2020-4-8   | 4.268 | 2.56   | 0.2   | 2020/05/23 | 4     | 2.21   | 0.15  | 10      | T3N1M1b |
| Patient 9  | 75 | Bicalutamide, zoledronic acid, thymalfasin, and dressing change, anemia correction, stomach protection, immunity enhancement, anti-infection, and other symptomatic support treatments | 2017-6-6   | 2.53  | 11.74  | 1.22  | 2018-9-29  | 0.81  | 1.95   | 0.22  | Unknown | T2N0M1b |
| Patient 10 | 70 | Bicalutamide, zoledronic acid, and thymalfasin                                                                                                                                         | 2017-10-28 | 4.36  | 28.27  | 2.81  | 2019-11-21 | 0.199 | 0      | 0     | Unknown | TxN0M1b |
| Patient 11 | 68 | Bicalutamide, zoledronic acid, and thymalfasin                                                                                                                                         | 2021-10-28 | 100   | 37.67  | 3.42  | 2022-5-5   | 48.7  | 22.08  | 2.17  | 9       | T4N1M1b |
| Patient 12 | 70 | Bicalutamide, zoledronic acid, and thymalfasin                                                                                                                                         | 2021-10-17 | 40.93 | 36.87  | 15.55 | 2022-3-23  | 0.583 | 0.25   | 0.12  | 10      | T4N1M0  |
| Patient 13 | 62 | Bicalutamide, zoledronic acid, and thymalfasin                                                                                                                                         | 2021-10-22 | 61.31 | 510    | 50    | 2022-4-29  | 20.59 | 110.2  | 4.02  | Unknown | TxN1M1b |
| Patient 14 | 79 | Abiraterone, enzalutamide, zoledronic acid, and thymalfasin                                                                                                                            | 2022-3-3   | 17.4  | 493.9  | 40.1  | 2022-4-1   | 19.51 | 471.6  | 41.2  | Unknown | T4N1M1c |
| Patient 15 | 51 | Abiraterone, abiraterone, zoledronic acid, and thymalfasin                                                                                                                             | 2021-12-23 | 5.516 | 1.82   | 0.35  | 2022-4-8   | 7.73  | 5.26   | 0.42  | 7       | T2N1M1b |
| Patient 16 | 67 | Bicalutamide, zoledronic acid, and thymalfasin                                                                                                                                         | 2021-6-8   | 7.424 | 27.63  | 3.3   | 2022-1-7   | 0.729 | 0.46   | 0.08  | 7       | T3N1M1c |
| Patient 17 | 66 | Bicalutamide, zoledronic acid, and thymalfasin                                                                                                                                         | 2018-10-23 | 12.3  | 23.56  | 1.47  | 2018-11-1  | 14.2  | 15.99  | 1.25  | Unknown | T4N1M1c |
| Patient 18 | 70 | Bicalutamide, zoledronic acid, thymalfasin, and vitamin C                                                                                                                              | 2022-3-25  | 30.38 | 673.55 | 65.55 | 2022-3-31  | 23.91 | 687.2  | 62.4  | Unknown | T2N1M1b |
| Patient 19 | 93 | Bicalutamide, zoledronic acid, and thymalfasin                                                                                                                                         | 2021-5-26  | 52.6  | 240    | 19.35 | 2021-6-24  | 23.6  | 189.02 | 12.89 | Unknown | T3N0M1c |
| Patient 20 | 73 | Abiraterone, zoledronic acid, and thymalfasin                                                                                                                                          | 2020-3-10  | 31.55 | 701.47 | 33    | 2020-8-19  | 30.08 | 515.1  | 18.62 | Unknown | T4N1M1c |

**Supplemental Table 2. Characteristics of 43 advanced or metastatic PCa patients enrolled in this retrospective analysis. Detailed information of PCa patients in Figure 1.**

|                                         | Control (n = 23) | ZA+Tα1 (n = 20) |
|-----------------------------------------|------------------|-----------------|
| <b>Age at enrollment (years old)</b>    |                  |                 |
| ≥ 60                                    | 21               | 19              |
| < 60                                    | 2                | 1               |
| <b>ECOG</b>                             |                  |                 |
| 0                                       | 6                | 6               |
| 1                                       | 10               | 7               |
| ≥ 2                                     | 7                | 7               |
| <b>Gleason score</b>                    |                  |                 |
| ≤ 6                                     | 1                | 0               |
| 7                                       | 5                | 3               |
| ≥ 8                                     | 8                | 6               |
| Unknown                                 | 9                | 11              |
| <b>Disease site at baseline</b>         |                  |                 |
| Bone metastasis only                    | 6                | 2               |
| Lymph node metastasis only              | 3                | 3               |
| Bone + lymph node metastases            | 5                | 8               |
| Visceral + bone metastases              | 3                | 1               |
| Visceral + bone + lymph node metastases | 5                | 5               |
| No/unknown                              | 1                | 1               |

**Supplemental Table 3. Adverse events of 43 advanced or metastatic PCa patients receiving ADT with/without ZA and Tα1. Detailed information of PCa patients in Figure 1.**

| Adverse events                    | Control (n = 23) |          | ZA+Tα1 (n = 20) |          |
|-----------------------------------|------------------|----------|-----------------|----------|
|                                   | Any Grade        | Grade ≥3 | Any Grade       | Grade ≥3 |
| <b>General disorders</b>          |                  |          |                 |          |
| Fatigue                           | 2 (8.7%)         | 0        | 1 (5.0%)        | 0        |
| Fever                             | 1 (4.3%)         | 0        | 2 (10.0%)       | 0        |
| <b>Gastrointestinal disorders</b> |                  |          |                 |          |

|                                             |            |          |           |   |
|---------------------------------------------|------------|----------|-----------|---|
| Diarrhea                                    | 1 (4.3%)   | 1 (4.3%) | 0         | 0 |
| Nausea                                      | 3 (13.0%)  | 0        | 0         | 0 |
| Anorexia                                    | 4 (17.4%)  | 0        | 3 (15.0%) | 0 |
| Vomiting                                    | 3 (13.0%)  | 0        | 0         | 0 |
| <b>Nervous system disorders</b>             |            |          |           |   |
| Dizziness                                   | 1 (4.3%)   | 1 (5.0%) | 0         | 0 |
| Headache                                    | 1 (4.3%)   | 0        | 0         | 0 |
| <b>Laboratory abnormalities</b>             |            |          |           |   |
| Renal insufficiency                         | 2 (8.7%)   | 0        | 2 (10.0%) | 0 |
| Hypocalcemia                                | 6 (26.1%)  | 0        | 4 (20.0%) | 0 |
| Hypophosphatemia                            | 2 (8.7%)   | 0        | 2 (10.0%) | 0 |
| Hypomagnesemia                              | 1 (4.3%)   | 0        | 0         | 0 |
| Elevated ALT                                | 2 (8.7%)   | 0        | 0         | 0 |
| Elevated AST                                | 1 (4.3%)   | 0        | 0         | 0 |
| <b>Blood and lymphatic system disorders</b> |            |          |           |   |
| Leukopenia                                  | 3 (13.0%)  | 1 (4.3%) | 3 (15.0%) | 0 |
| Anemia                                      | 11 (47.8%) | 0        | 4 (20.0%) | 0 |
| Thrombocytopenia                            | 0          | 1 (4.3%) | 2 (10.0%) | 0 |

**Supplementary Table 4. Primer sequences used for PCR.**

| Gene            | Forward primer sequences      | Reverse primer sequences      |
|-----------------|-------------------------------|-------------------------------|
| <i>m Cxcl9</i>  | 5'-TCCTTTTGGGCATCATCTTCC-3'   | 5'-TTTGTAGTGGATCGTGCCTCG-3'   |
| <i>m Cxcl10</i> | 5'-CCAAGTGCTGCCGTCATTTTC-3'   | 5'-GGCTCGCAGGGATGATTTCAA-3'   |
| <i>m Cxcl11</i> | 5'-GGCTTCCTTATGTTCAAACAGGG-3' | 5'-GCCGTTACTCGGGTAAATTACA-3'  |
| <i>m Myd88</i>  | 5'-TCATGTTCTCCATACCCTTGGT-3'  | 5'-AAACTGCGAGTGGGGTCAG-3'     |
| <i>m Idol</i>   | 5'-GCTTTGCTCTACCACATCCAC-3'   | 5'-CAGGCGCTGTAACCTGTGT-3'     |
| <i>m Ccl2</i>   | 5'-TTAAAAACCTGGATCGGAACCAA-3' | 5'-GCATTAGCTTCAGATTTACGGGT-3' |
| <i>m Ccl5</i>   | 5'-GCTGCTTTGCCTACCTCTCC-3'    | 5'-TCGAGTGACAAACACGACTGC-3'   |
| <i>m Tnf</i>    | 5'-CCCTCACACTCAGATCATCTTCT-3' | 5'-GCTACGACGTGGGCTACAG-3'     |
| <i>m Csf1</i>   | 5'-GGCTTGGCTTGGGATGATTCT-3'   | 5'-GAGGGTCTGGCAGGTACTC-3'     |
| <i>m Csf2</i>   | 5'-GGCCTTGAAGCATGTAGAGG-3'    | 5'-GGAGAACTCGTTAGAGACGACTT-3' |
| <i>m Ifng</i>   | 5'-ATGAACGCTACACACTGCATC-3'   | 5'-CCATCCTTTTGCCAGTTCCTC-3'   |

---

|                 |                                 |                                 |
|-----------------|---------------------------------|---------------------------------|
| <i>m Il4</i>    | 5'-GGTCTCAACCCCCAGCTAGT-3'      | 5'-GCCGATGATCTCTCTCAAGTGAT-3'   |
| <i>m Cd86</i>   | 5'-TGTTTCCGTGGAGACGCAAG-3'      | 5'-TTGAGCCTTTGTAAATGGGCA-3'     |
| <i>m Tgfb1</i>  | 5'-CTCCCGTGGCTTCTAGTGC-3'       | 5'-GCCTTAGTTTGGACAGGATCTG-3'    |
| <i>m Nos2</i>   | 5'-GTTCTCAGCCCAACAATACAAGA-3'   | 5'-GTGGACGGGTCGATGTCAC-3'       |
| <i>m Arg1</i>   | 5'-CTCCAAGCCAAAGTCCTTAGAG-3'    | 5'-AGGAGCTGTCATTAGGGACATC-3'    |
| <i>m Cd206</i>  | 5'-CTCTGTTTCAGCTATTGGACGC-3'    | 5'-CGGAATTTCTGGGATTCAGCTTC-3'   |
| <i>m Gzmb</i>   | 5'-CCACTCTCGACCCTACATGG-3'      | 5'-GGCCCCAAAGTGACATTTATT-3'     |
| <i>m Il10</i>   | 5'-GCTCTTACTGACTGGCATGAG-3'     | 5'-CGCAGCTCTAGGAGCATGTG-3'      |
| <i>m Il12</i>   | 5'-CCCAGCACTGCATAAACTAAGTATG-3' | 5'-ATTCCAAAAGCTTCTGTTCTTCCAG-3' |
| <i>m Actb</i>   | 5'-GGCTGTATTCCCCTCCATCG-3'      | 5'-CCAGTTGGTAACAATGCCATGT-3'    |
| <i>h CD86</i>   | 5'-CTGCTCATCTATAACCGTTACC-3'    | 5'-GGAAACGTCGTACAGTTCTGTG-3'    |
| <i>h NOS2</i>   | 5'-GATCAAAAAGTGGGGCAGCG-3'      | 5'-CTCATCTGGAGGGTAGGCT-3'       |
| <i>h ARG1</i>   | 5'-GTCTGTGGGAAAAGCAAGCG-3'      | 5'-CACCAGGCTGATTCTTCCGT-3'      |
| <i>h CD206</i>  | 5'-GGGTTGCTATCACTCTCTATGC-3'    | 5'-TTTCTGTCTGTTGCCGTAGTT-3'     |
| <i>h CCL2</i>   | 5'-GATCTCAGTGCAGAGGCTCG-3'      | 5'-TTTGCTTGTCAGGTGGTCC-3'       |
| <i>h CCL5</i>   | 5'-CCCCATATTCTCGGACACC-3'       | 5'-TCCTTGACCTGTGGACGACT-3'      |
| <i>h CXCL9</i>  | 5'-ATTGGAGTGCAAGGAACCCC-3'      | 5'-ATTTTCTCGCAGGAAGGGCT-3'      |
| <i>h CXCL10</i> | 5'-CTGAGCCTACAGCAGAGGAAC-3'     | 5'-GATGCAGGTACAGCGTACAGT-3'     |
| <i>h CXCL11</i> | 5'-TGCCCAAAGGAGTCCAACAA-3'      | 5'-TCCGATGGTAACCAGCCTTT-3'      |
| <i>h TNF</i>    | 5'-CTCAAAAAGAGAATTGGGGGCTTAG-3' | 5'-AGTTTGAATTCTTAGTGGTTGCCAG-3' |
| <i>h IL4</i>    | 5'-CTTTGCTGCCTCCAAGAACAC-3'     | 5'-GCGAGTGCCTTCTCATGGT-3'       |
| <i>h CSF1</i>   | 5'-CCGGGGAAAGTGAAAGTTTGC-3'     | 5'-CAGACCAACAACAGCAGGGA-3'      |
| <i>h CSF2</i>   | 5'-AATGTTTGACCTCCAGGAGCC-3'     | 5'-TCTGGGTTGCACAGGAAGTTT-3'     |
| <i>h TGFBI</i>  | 5'-GGAGAGAGGACTGCGGATCT-3'      | 5'-CAGTGCCCAAGGTGCTCAATA-3'     |
| <i>h IL12</i>   | 5'-TGCCCATGAGGTCATGGTG-3'       | 5'-CTTGGGTGGGTCAGGTTTGA-3'      |
| <i>h IL10</i>   | 5'-AAAAGAAGGCATGCACAGCTCA-3'    | 5'-ACATGCGCCTTGATGTCTGG-3'      |
| <i>h GZNB</i>   | 5'-GGCAGCCTTCTGAGAAGAT-3'       | 5'-GGAAAAGTCTGCATCTGCCCT-3'     |
| <i>h IFNG</i>   | 5'-TGTCGCCAGCAGCTAAAACA-3'      | 5'-TGCAGGCAGGACAACCATTA-3'      |
| <i>h PRF1</i>   | 5'-GTGGGACAATAACAACCCCAT-3'     | 5'-TGGCATGATAGCGGAATTTAGG-3'    |

---

---

|               |                            |                            |
|---------------|----------------------------|----------------------------|
| <i>h ACTB</i> | 5'-AGCCTCGCCTTTGCCGATCC-3' | 5'-ACATGCCGGAGCCGTTGTCG-3' |
|---------------|----------------------------|----------------------------|

---

**Supplementary Table 5. siRNA sequences used for cell transfection.**

---

| <b>Gene</b> | <b>Sense sequences</b>       | <b>Anti-sense sequences</b> |
|-------------|------------------------------|-----------------------------|
| siMyD88 #1  | 5'-GGCACCUGUGUCUGGUCUATT-3'  | 5'-UAGACCAGACACAGGUGCCTT-3' |
| siMyD88 #2  | 5'-CUGGAACAGACAAACUAUUCTT-3' | 5'-GAUAGUUUGUCUGUCCAGTT-3'  |

---
